# Supplementary material
Source: PubMed Central journal article supplement (PMC7196029)

Figure S4

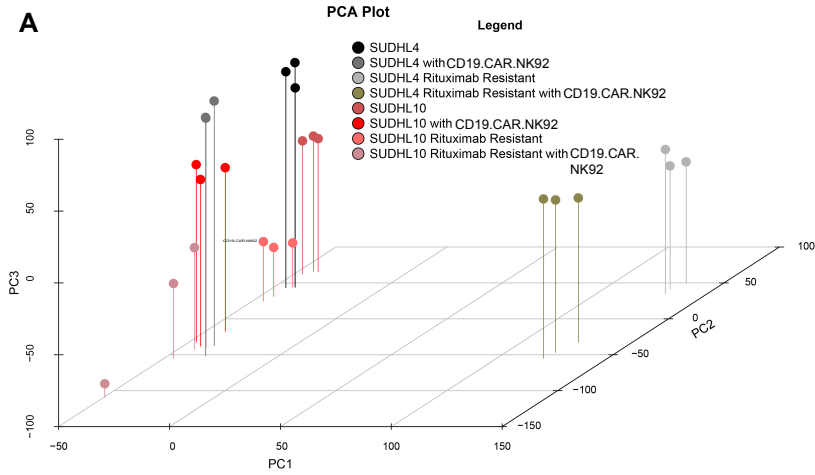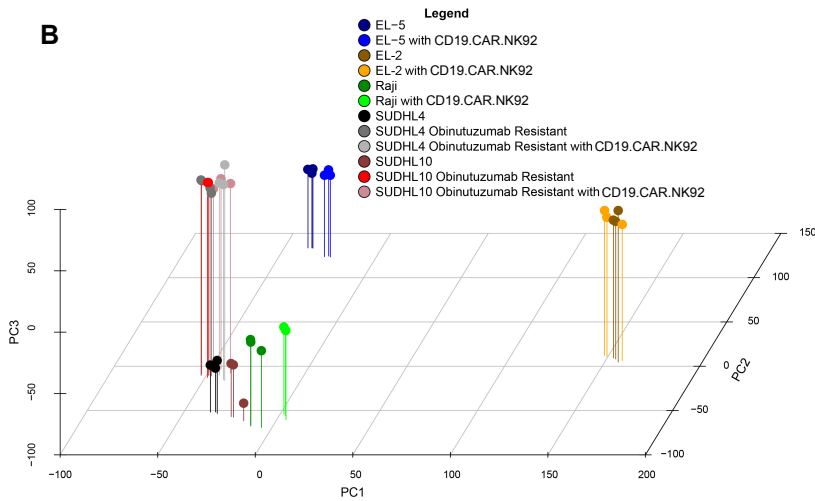

Supplement: NIHMS1543400-supplement-6.pdf [file NIHMS1543400-supplement-6.pdf]
